# Supplementary material for: Dealing with Insecurity: A Thematic Analysis of Self-reflection in Psychotherapy Training
Source: Research Square preprint supplement (doi:10.21203/rs.3.rs-6990651/v1), 2025-07-15
Supplement: Supplementary file 1 [file 7ef4bad1c29b449188cb48ff.docx]

**Appendix**

Guideline questions

During your internship you will conduct different therapeutic tasks. Please choose three of these that you consider particularly suitable for written self-reflection. For each of the three therapeutic tasks, respond to the following questions in a separate reflection:

- What was the therapeutic task (theoretical background, authors)?

- What was the purpose of the therapeutic task (which group of patients, why this group of patients?)

- How did that work (description as detailed as possible)?

- What feelings/thoughts did you have during accomplishing the therapeutic task and how did you deal with those?

- What did you learn from the therapeutic task regarding your further studies? Which conclusions do you like to draw from this for yourself?
